# Supplementary material for: Efficacy of intermittent pneumatic compression for venous thromboembolism prophylaxis in patients undergoing gynecologic surgery: A systematic review and meta-analysis
Source: PubMed Central journal article supplement (PMC5386769; doi:10.18632/oncotarget.13620), 2016-11-25
Supplement: oncotarget-08-20371-s001.pdf [file oncotarget-08-20371-s001.pdf]

# Efficacy of intermittent pneumatic compression for venous thromboembolism prophylaxis in patients undergoing gynecologic surgery: A systematic review and meta-analysis

## SUPPLEMENTARY FIGURES

|                          | Random sequence generation (selection bias) | Allocation concealment (selection bias) | Blinding of participants and personnel (performance bias) | Blinding of outcome assessment (detection bias) | Incomplete outcome data (attrition bias) | Selective reporting (reporting bias) | Other bias |
|--------------------------|---------------------------------------------|-----------------------------------------|-----------------------------------------------------------|-------------------------------------------------|------------------------------------------|--------------------------------------|------------|
| Clarke and Creasman 1984 | ?                                           | ?                                       | -                                                         | ?                                               | +                                        | +                                    | +          |
| Clarke and Synan 1984    | +                                           | ?                                       | -                                                         | +                                               | +                                        | +                                    | +          |
| Clarke and Synan 1993    | +                                           | ?                                       | -                                                         | ?                                               | +                                        | +                                    | +          |
| Gao 2012                 | +                                           | ?                                       | ?                                                         | ?                                               | +                                        | +                                    | +          |
| Maxwell 2001             | +                                           | ?                                       | -                                                         | ?                                               | +                                        | +                                    | +          |
| Nagata 2015              | +                                           | +                                       | -                                                         | +                                               | +                                        | +                                    | ?          |
| Yang 2009                | ?                                           | ?                                       | -                                                         | ?                                               | +                                        | +                                    | +          |

Supplementary Figure 1: Risk of bias summary: review authors' judgements about each risk of bias item for each included study.

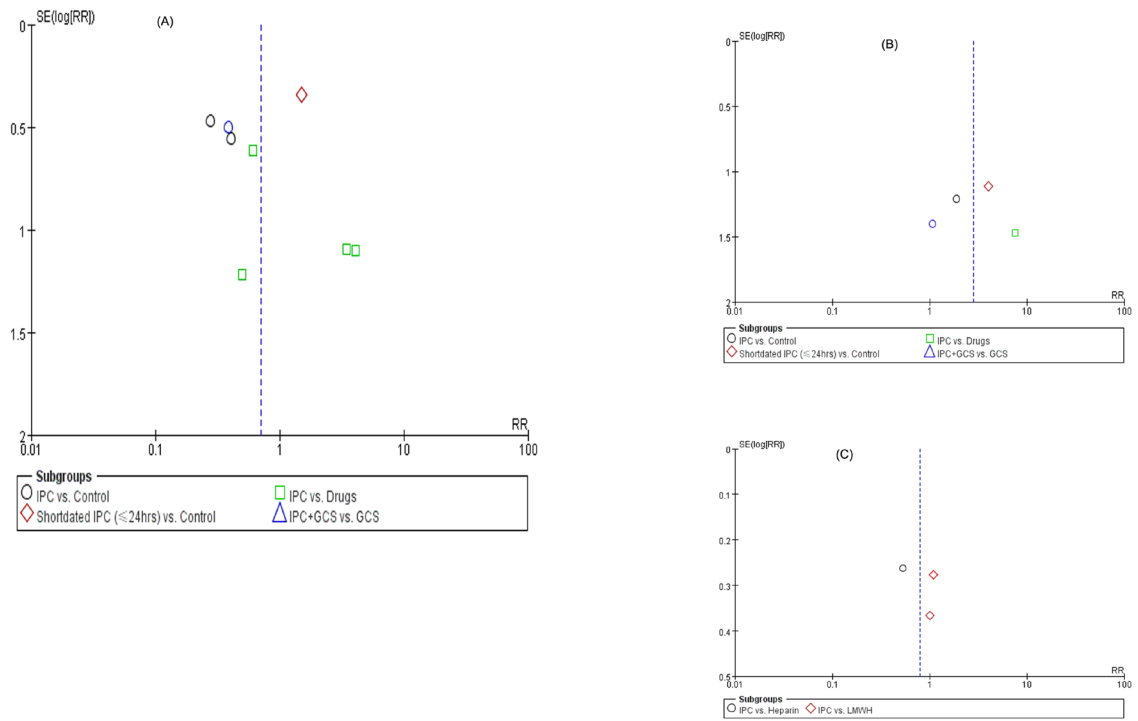

Supplementary Figure 2: Funnel plots of A. DVT, B. PE, and C. transfusion rates.

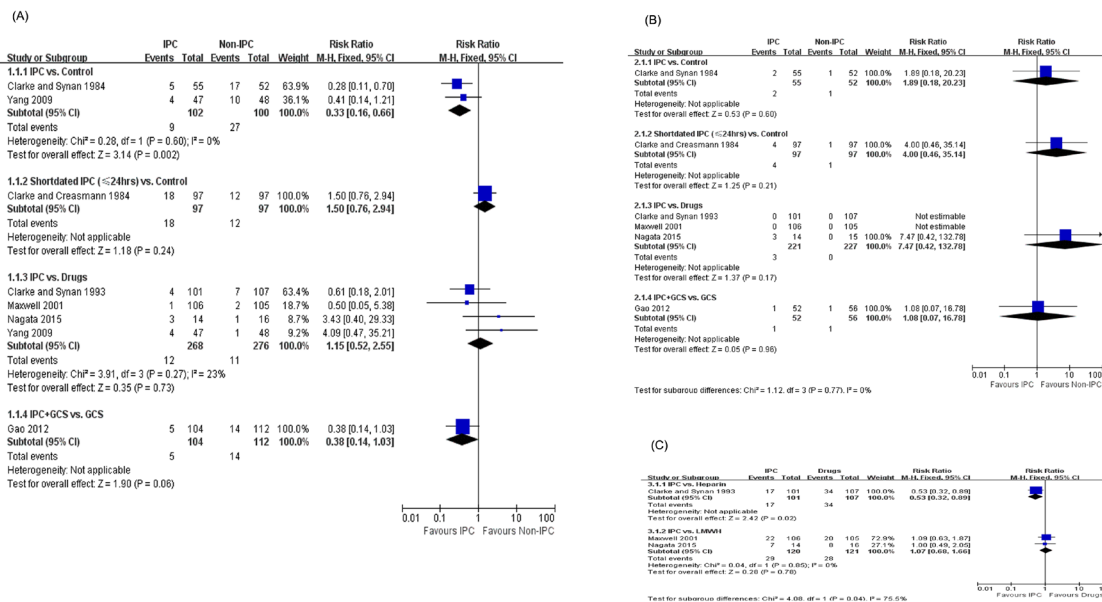

Supplementary Figure 3: Fixed-effect model meta-analysis of A. the effectiveness of IPC on DVT prophylaxis, stratified by IPC duration and comparator, B. the effectiveness of IPC on PE prophylaxis, stratified by IPC duration and comparator, and C. perioperative transfusion rate, stratified by comparator agent.
